# Supplementary material for: Spectral Characteristic, Storage Stability and Antioxidant Properties of Anthocyanin Extracts from Flowers of Butterfly Pea (Clitoria ternatea L.)
Source: MDPI journal article supplement (doi:10.3390/molecules26227000), 2021-11-19
Supplement: s1 [file s1]

**Figure S1**

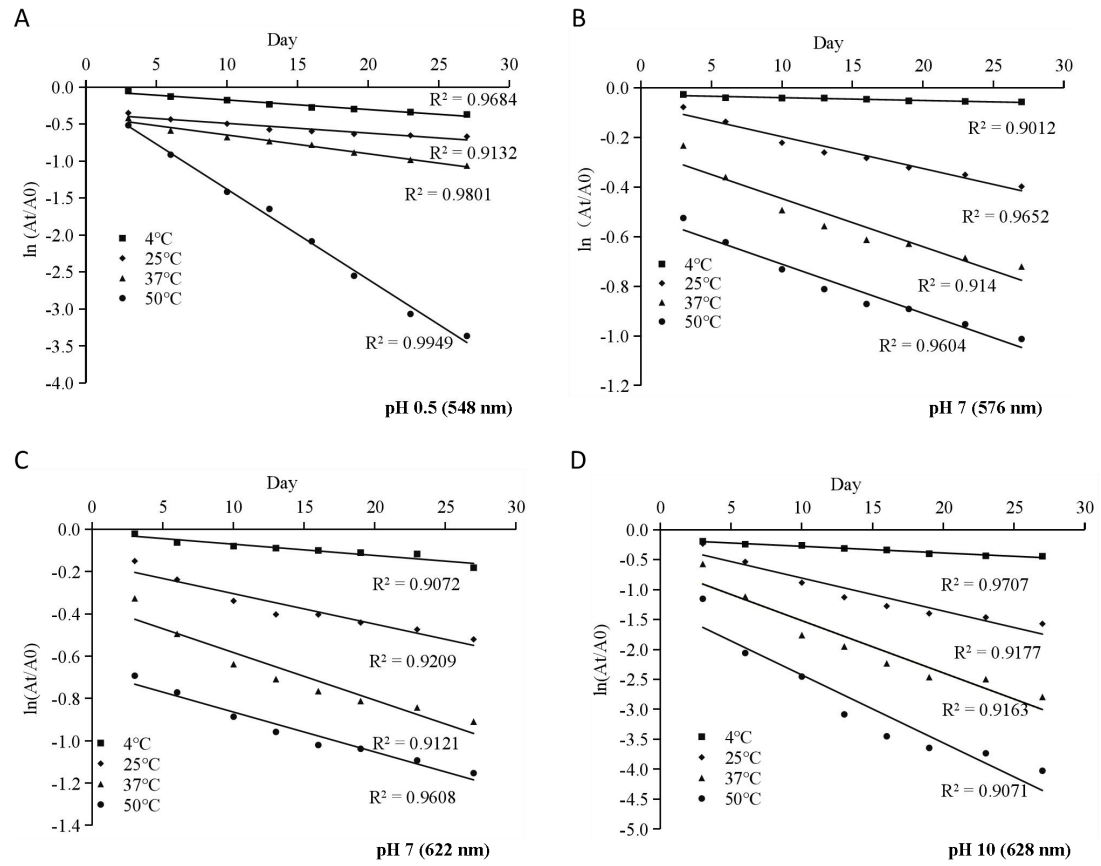

**Figure S1.** Degradation kinetics of CTAEs at pH 0.5, 7 and 10 in dark at 4, 25, 37 and 50°C. (A) Decay of OD<sub>548</sub> for CTAEs at pH 0.5. (B-C) Decay of OD<sub>576</sub> and OD<sub>622</sub> for CTAEs at pH 7. (D) Decay of OD<sub>628</sub> for CTAEs at pH 10.
